# Supplementary material for: Low-Concentration T-2 Toxin Attenuates Pseudorabies Virus Replication in Porcine Kidney 15 Cells
Source: MDPI journal article supplement (doi:10.3390/toxins14020121), 2022-02-06
Supplement: s1 [file s1]

# Supplementary Materials: Low-Concentration T-2 Toxin Attenuates Pseudorabies Virus Replication in Porcine Kidney 15 Cells

Kuankuan Xiong, Lei Tan, Siliang Yi, Yingxin Wu, Yi Hu, Aibing Wang and Lingchen Yang

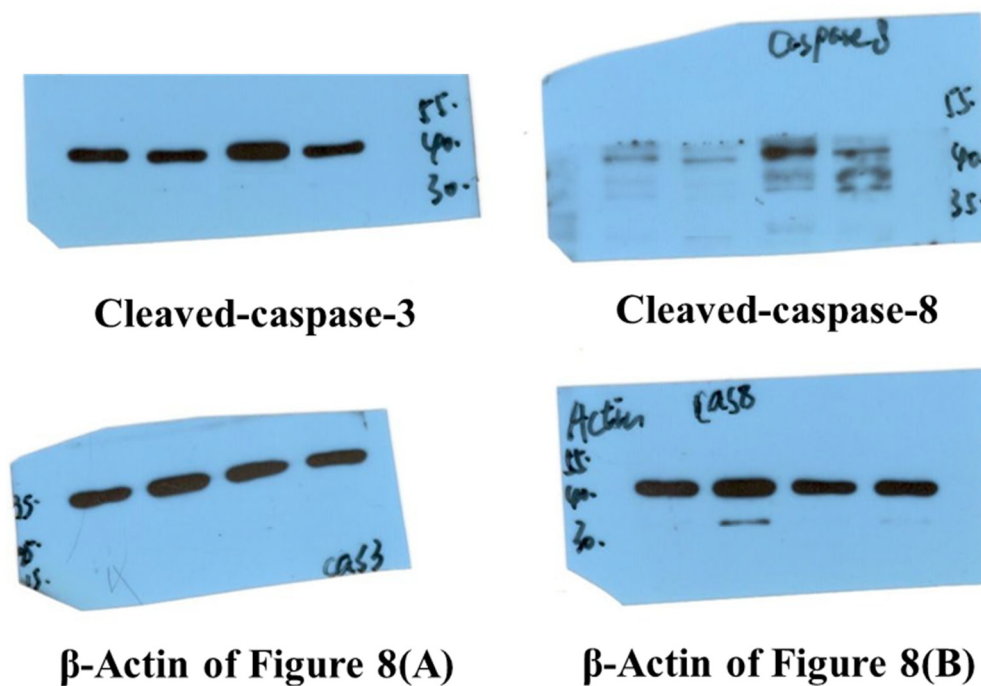

**Figure S1.** The full original scan of the Western blot results of Figure 8 in the article.

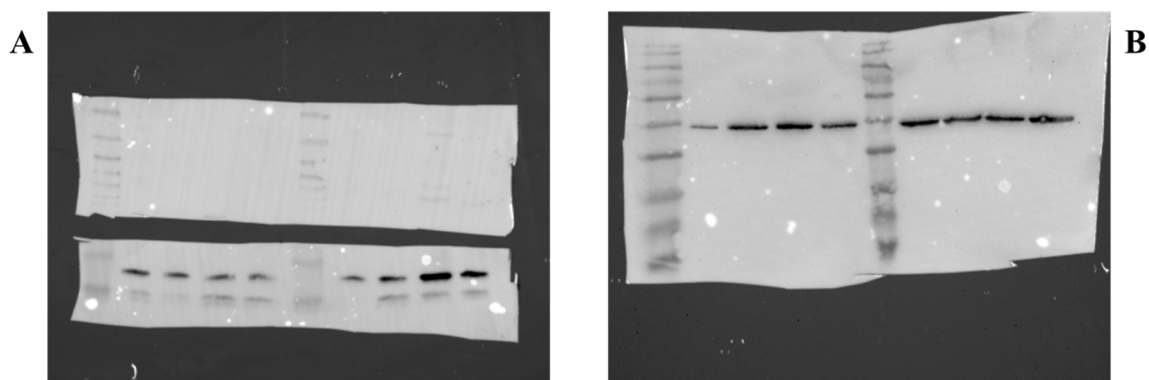

**Figure S2.** The full original scan of the Western blot results of Figure 8 in the article. (A) BAX and Bcl-2. (B) β-Actin in Figure 8-C.

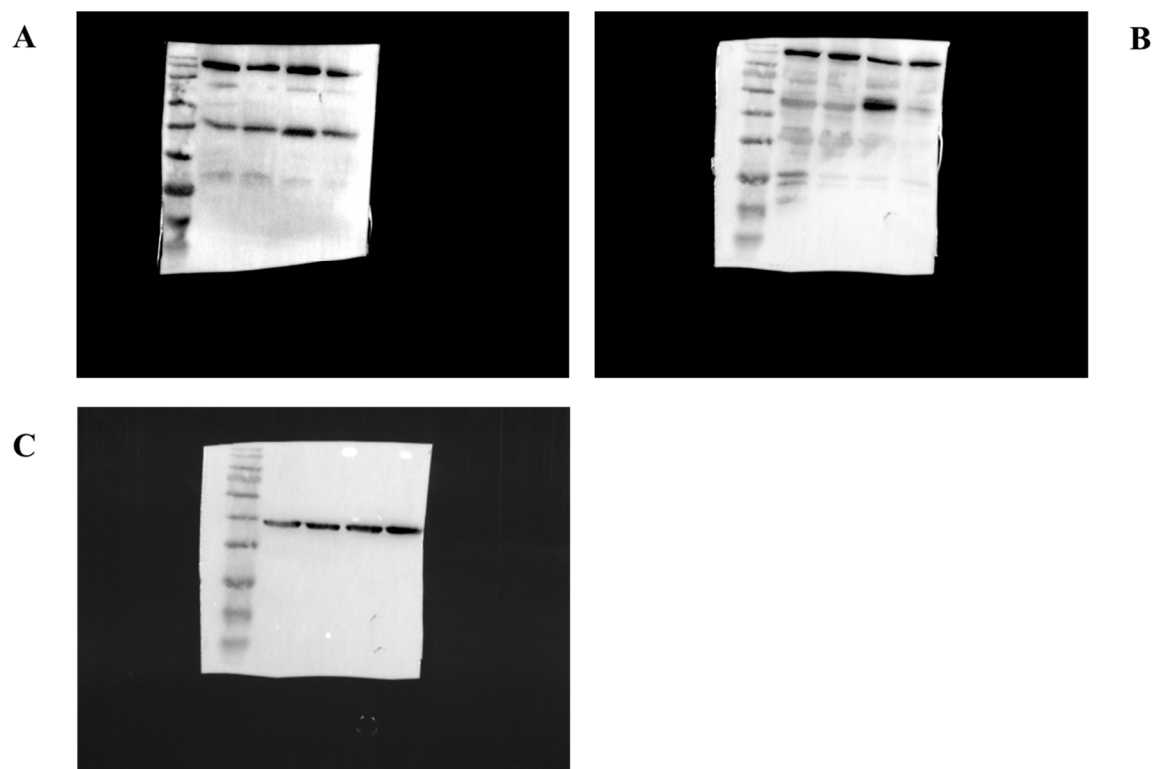

**Figure S3.** The full original scan of the Western blot results of Figure 8 in the article. (A) Gpx-1. (B) Nrf2. (C)  $\beta$ -Actin in Figure 8-D and E.
